# Supplementary material for: Impact of Mobile Apps in Conjunction With Percutaneous Endoscopic Gastrostomy on Patients' Complications, Quality of Life, and Health-Related Self-Care Behaviors: Randomized Clinical Trial
Source: PubMed Central journal article supplement (PMC10625096; doi:10.2196/48970), 2023-10-20
Supplement: mhealth_v11i1e48970_app1.pdf [file mhealth_v11i1e48970_app1.pdf]

| <b>CONSORT-EHEALTH Checklist V1.6.2 Report</b>                                                                                                                                               | <b>Manuscript Number</b> | 48970 |
|----------------------------------------------------------------------------------------------------------------------------------------------------------------------------------------------|--------------------------|-------|
| (based on CONSORT-EHEALTH V1.6), available at [ <a href="http://tinyurl.com/consort-ehealth-v1-6">http://tinyurl.com/consort-ehealth-v1-6</a> ].                                             |                          |       |
| <b>Date completed</b><br>10/18/2023 21:32:52                                                                                                                                                 |                          |       |
| <b>by</b><br>Li-Chan Lin                                                                                                                                                                     |                          |       |
| Impact of Mobile Apps in Conjunction With Percutaneous Endoscopic Gastrostomy on Patients' Complications, Quality of Life, and Health-Related Self-Care Behaviors: Randomized Clinical Trial |                          |       |
| <b>TITLE</b>                                                                                                                                                                                 |                          |       |
| <b>1a-i) Identify the mode of delivery in the title</b><br>Yes, it can copy and paste from title page.                                                                                       |                          |       |
| <b>1a-ii) Non-web-based components or important co-interventions in title</b>                                                                                                                |                          |       |
| <b>1a-iii) Primary condition or target group in the title</b><br>No, it is not applicable..                                                                                                  |                          |       |
| <b>ABSTRACT</b>                                                                                                                                                                              |                          |       |
| <b>1b-i) Key features/functionality/components of the intervention and comparator in the METHODS section of the ABSTRACT</b><br>Yes, it can be copy and paste from abstract. p.1             |                          |       |
| <b>1b-ii) Level of human involvement in the METHODS section of the ABSTRACT</b>                                                                                                              |                          |       |
| <b>1b-iii) Open vs. closed, web-based (self-assessment) vs. face-to-face assessments in the METHODS section of the ABSTRACT</b>                                                              |                          |       |
| <b>1b-iv) RESULTS section in abstract must contain use data</b>                                                                                                                              |                          |       |
| <b>1b-v) CONCLUSIONS/DISCUSSION in abstract for negative trials</b>                                                                                                                          |                          |       |
| <b>INTRODUCTION</b>                                                                                                                                                                          |                          |       |
| <b>2a-i) Problem and the type of system/solution</b><br>Yes, please see the manuscript p. 3-4..                                                                                              |                          |       |
| <b>2a-ii) Scientific background, rationale: What is known about the (type of) system</b><br>Yes, it can copy and paste from relevant sections.                                               |                          |       |
| <b>Does your paper address CONSORT subitem 2b?</b><br>Yes, it can copy and paste from the manuscript.                                                                                        |                          |       |
| <b>METHODS</b>                                                                                                                                                                               |                          |       |
| <b>3a) CONSORT: Description of trial design (such as parallel, factorial) including allocation ratio</b><br>Yes, it can copy and paste.                                                      |                          |       |
| <b>3b) CONSORT: Important changes to methods after trial commencement (such as eligibility criteria), with reasons</b><br>Yes, it can copy and paste                                         |                          |       |
| <b>3b-i) Bug fixes, Downtimes, Content Changes</b>                                                                                                                                           |                          |       |
| <b>4a) CONSORT: Eligibility criteria for participants</b><br>Yes, it can be seen in p.6.                                                                                                     |                          |       |
| <b>4a-i) Computer / Internet literacy</b>                                                                                                                                                    |                          |       |

|                                                                                                                                                                         |  |  |
|-------------------------------------------------------------------------------------------------------------------------------------------------------------------------|--|--|
| <b>4a-ii) Open vs. closed, web-based vs. face-to-face assessments:</b><br>No, it is not necessary to explain.                                                           |  |  |
| <b>4a-iii) Information giving during recruitment</b>                                                                                                                    |  |  |
| <b>4b) CONSORT: Settings and locations where the data were collected</b><br>Yes, it can be seen in p.6.                                                                 |  |  |
| <b>4b-i) Report if outcomes were (self-)assessed through online questionnaires</b><br>Yes, it can be seen in p.6-7                                                      |  |  |
| <b>4b-ii) Report how institutional affiliations are displayed</b>                                                                                                       |  |  |
| <b>5) CONSORT: Describe the interventions for each group with sufficient details to allow replication, including how and when they were actually administered</b>       |  |  |
| <b>5-i) Mention names, credential, affiliations of the developers, sponsors, and owners</b>                                                                             |  |  |
| <b>5-ii) Describe the history/development process</b>                                                                                                                   |  |  |
| <b>5-iii) Revisions and updating</b>                                                                                                                                    |  |  |
| <b>5-iv) Quality assurance methods</b>                                                                                                                                  |  |  |
| <b>5-v) Ensure replicability by publishing the source code, and/or providing screenshots/screen-capture video, and/or providing flowcharts of the algorithms used</b>   |  |  |
| <b>5-vi) Digital preservation</b>                                                                                                                                       |  |  |
| <b>5-vii) Access</b><br>Yes, please see the manuscript p. 7.                                                                                                            |  |  |
| <b>5-viii) Mode of delivery, features/functionalities/components of the intervention and comparator, and the theoretical framework</b><br>Yes, it can be seen in p. 7.  |  |  |
| <b>5-ix) Describe use parameters</b>                                                                                                                                    |  |  |
| <b>5-x) Clarify the level of human involvement</b>                                                                                                                      |  |  |
| <b>5-xi) Report any prompts/reminders used</b><br>Yes, it is not applicable.                                                                                            |  |  |
| <b>5-xii) Describe any co-interventions (incl. training/support)</b><br>No, it is not applicable.                                                                       |  |  |
| <b>6a) CONSORT: Completely defined pre-specified primary and secondary outcome measures, including how and when they were assessed</b><br>Yes, it can be seen in p.8-9. |  |  |
| <b>6a-i) Online questionnaires: describe if they were validated for online use and apply CHERRIES items to describe how the questionnaires were designed/deployed</b>   |  |  |
| <b>6a-ii) Describe whether and how “use” (including intensity of use/dosage) was defined/measured/monitored</b>                                                         |  |  |
| <b>6a-iii) Describe whether, how, and when qualitative feedback from participants was obtained</b>                                                                      |  |  |
| <b>6b) CONSORT: Any changes to trial outcomes after the trial commenced, with reasons</b>                                                                               |  |  |

|                                                                                                                                                                                                                |  |  |
|----------------------------------------------------------------------------------------------------------------------------------------------------------------------------------------------------------------|--|--|
| Yes, it can be seen in p.6.                                                                                                                                                                                    |  |  |
| <b>7a) CONSORT: How sample size was determined</b>                                                                                                                                                             |  |  |
| <b>7a-i) Describe whether and how expected attrition was taken into account when calculating the sample size</b>                                                                                               |  |  |
|                                                                                                                                                                                                                |  |  |
| <b>7b) CONSORT: When applicable, explanation of any interim analyses and stopping guidelines</b>                                                                                                               |  |  |
| Yes, it can be seen in p.8-9.                                                                                                                                                                                  |  |  |
| <b>8a) CONSORT: Method used to generate the random allocation sequence</b>                                                                                                                                     |  |  |
| Yes, it can be seen in p.5.                                                                                                                                                                                    |  |  |
| <b>8b) CONSORT: Type of randomisation; details of any restriction (such as blocking and block size)</b>                                                                                                        |  |  |
| Yes, it can be seen in p.5.                                                                                                                                                                                    |  |  |
| <b>9) CONSORT: Mechanism used to implement the random allocation sequence (such as sequentially numbered containers), describing any steps taken to conceal the sequence until interventions were assigned</b> |  |  |
| Yes, it can be seen in p.5.                                                                                                                                                                                    |  |  |
| <b>10) CONSORT: Who generated the random allocation sequence, who enrolled participants, and who assigned participants to interventions</b>                                                                    |  |  |
| Yes, it can be seen in p.5.                                                                                                                                                                                    |  |  |
| <b>11a) CONSORT: Blinding - If done, who was blinded after assignment to interventions (for example, participants, care providers, those assessing outcomes) and how</b>                                       |  |  |
| <b>11a-i) Specify who was blinded, and who wasn't</b>                                                                                                                                                          |  |  |
| No, it is not applicable.                                                                                                                                                                                      |  |  |
| <b>11a-ii) Discuss e.g., whether participants knew which intervention was the "intervention of interest" and which one was the "comparator"</b>                                                                |  |  |
|                                                                                                                                                                                                                |  |  |
| <b>11b) CONSORT: If relevant, description of the similarity of interventions</b>                                                                                                                               |  |  |
| No, it is not applicable.                                                                                                                                                                                      |  |  |
| <b>12a) CONSORT: Statistical methods used to compare groups for primary and secondary outcomes</b>                                                                                                             |  |  |
| Yes, it can be seen in p.9-10.                                                                                                                                                                                 |  |  |
| <b>12a-i) Imputation techniques to deal with attrition / missing values</b>                                                                                                                                    |  |  |
| No, it is not applicable.                                                                                                                                                                                      |  |  |
| <b>12b) CONSORT: Methods for additional analyses, such as subgroup analyses and adjusted analyses</b>                                                                                                          |  |  |
| Yes, it can be seen in p.9-10.                                                                                                                                                                                 |  |  |
| <b>RESULTS</b>                                                                                                                                                                                                 |  |  |
| <b>13a) CONSORT: For each group, the numbers of participants who were randomly assigned, received intended treatment, and were analysed for the primary outcome</b>                                            |  |  |
| Yes, it can be seen in p.6.                                                                                                                                                                                    |  |  |
| <b>13b) CONSORT: For each group, losses and exclusions after randomisation, together with reasons</b>                                                                                                          |  |  |
| Yes, it can be seen in p.6.                                                                                                                                                                                    |  |  |
| <b>13b-i) Attrition diagram</b>                                                                                                                                                                                |  |  |
|                                                                                                                                                                                                                |  |  |
| <b>14a) CONSORT: Dates defining the periods of recruitment and follow-up</b>                                                                                                                                   |  |  |
| Yes, it can be seen in p.6.                                                                                                                                                                                    |  |  |
| <b>14a-i) Indicate if critical "secular events" fell into the study period</b>                                                                                                                                 |  |  |
|                                                                                                                                                                                                                |  |  |
| <b>14b) CONSORT: Why the trial ended or was stopped (early)</b>                                                                                                                                                |  |  |
| Yes, it can be seen in p.6.                                                                                                                                                                                    |  |  |
| <b>15) CONSORT: A table showing baseline demographic and clinical characteristics for each group</b>                                                                                                           |  |  |
| Yes, it can be seen in p.11.                                                                                                                                                                                   |  |  |
| <b>15-i) Report demographics associated with digital divide issues</b>                                                                                                                                         |  |  |
| No, it is not applicable.                                                                                                                                                                                      |  |  |

|                                                                                                                                                                        |  |  |
|------------------------------------------------------------------------------------------------------------------------------------------------------------------------|--|--|
| <b>16a) CONSORT: For each group, number of participants (denominator) included in each analysis and whether the analysis was by original assigned groups</b>           |  |  |
| <b>16-i) Report multiple “denominators” and provide definitions</b>                                                                                                    |  |  |
| Yes, it can be seen in p.12-13.                                                                                                                                        |  |  |
| <b>16-ii) Primary analysis should be intent-to-treat</b>                                                                                                               |  |  |
| <b>17a) CONSORT: For each primary and secondary outcome, results for each group, and the estimated effect size and its precision (such as 95% confidence interval)</b> |  |  |
| Yes, it can be seen in p.12-13.                                                                                                                                        |  |  |
| <b>17a-i) Presentation of process outcomes such as metrics of use and intensity of use</b>                                                                             |  |  |
| <b>17b) CONSORT: For binary outcomes, presentation of both absolute and relative effect sizes is recommended</b>                                                       |  |  |
| Yes, it can be seen in p.12-13.                                                                                                                                        |  |  |
| <b>18) CONSORT: Results of any other analyses performed, including subgroup analyses and adjusted analyses, distinguishing pre-specified from exploratory</b>          |  |  |
| Yes, it can be seen in p.11.                                                                                                                                           |  |  |
| <b>18-i) Subgroup analysis of comparing only users</b>                                                                                                                 |  |  |
| <b>19) CONSORT: All important harms or unintended effects in each group</b>                                                                                            |  |  |
| No, It is not applicable.                                                                                                                                              |  |  |
| <b>19-i) Include privacy breaches, technical problems</b>                                                                                                              |  |  |
| <b>19-ii) Include qualitative feedback from participants or observations from staff/researchers</b>                                                                    |  |  |
| <b>DISCUSSION</b>                                                                                                                                                      |  |  |
| <b>20) CONSORT: Trial limitations, addressing sources of potential bias, imprecision, multiplicity of analyses</b>                                                     |  |  |
| <b>20-i) Typical limitations in ehealth trials</b>                                                                                                                     |  |  |
| Yes, it can be seen in p.16.                                                                                                                                           |  |  |
| <b>21) CONSORT: Generalisability (external validity, applicability) of the trial findings</b>                                                                          |  |  |
| <b>21-i) Generalizability to other populations</b>                                                                                                                     |  |  |
| <b>21-ii) Discuss if there were elements in the RCT that would be different in a routine application setting</b>                                                       |  |  |
| <b>22) CONSORT: Interpretation consistent with results, balancing benefits and harms, and considering other relevant evidence</b>                                      |  |  |
| <b>22-i) Restate study questions and summarize the answers suggested by the data, starting with primary outcomes and process outcomes (use)</b>                        |  |  |
| Yes, it can be seen in p.17.                                                                                                                                           |  |  |
| <b>22-ii) Highlight unanswered new questions, suggest future research</b>                                                                                              |  |  |
| <b>Other information</b>                                                                                                                                               |  |  |
| <b>23) CONSORT: Registration number and name of trial registry</b>                                                                                                     |  |  |
| Yes, it can be seen in p.2.                                                                                                                                            |  |  |
| <b>24) CONSORT: Where the full trial protocol can be accessed, if available</b>                                                                                        |  |  |
| Yes, it can be seen in p.7.                                                                                                                                            |  |  |
| <b>25) CONSORT: Sources of funding and other support (such as supply of drugs), role of funders</b>                                                                    |  |  |
| Yes, it can copy and paste.                                                                                                                                            |  |  |
| <b>X26-i) Comment on ethics committee approval</b>                                                                                                                     |  |  |

|                                                                                       |  |  |
|---------------------------------------------------------------------------------------|--|--|
| <b>x26-ii) Outline informed consent procedures</b>                                    |  |  |
|                                                                                       |  |  |
| <b>X26-iii) Safety and security procedures</b>                                        |  |  |
|                                                                                       |  |  |
| <b>X27-i) State the relation of the study team towards the system being evaluated</b> |  |  |
|                                                                                       |  |  |
